# Supplementary material for: Global Scale Variation in the Salinity Sensitivity of Riverine Macroinvertebrates: Eastern Australia, France, Israel and South Africa
Source: PubMed Central journal article supplement (PMC3342278; doi:10.1371/journal.pone.0035224), 2012-05-02
Supplement: pone.0035224.s001.pdf [file pone.0035224.s001.pdf]

**Table S1. Salinity sensitivity data ( $\mu\text{S}/\text{cm}$  @  $25^\circ\text{C}$ ) collected from Israel.**

| Taxa                              | Order             | Water body | Salinity at collection ( $\mu\text{S}/\text{cm}$ ) | 72h $\text{LC}_{50}$ ( $\mu\text{S}/\text{cm}$ ) | No. of Specimen $\times$ replicates |
|-----------------------------------|-------------------|------------|----------------------------------------------------|--------------------------------------------------|-------------------------------------|
| <i>Laccophilus minutus</i>        | Coleoptera        | Avi'el     | 1020                                               | 58200                                            | 10 $\times$ 3                       |
| <i>Agabus biguttatus</i>          | Coleoptera        | Tut        | 590                                                | 50000                                            | 12 $\times$ 3                       |
| <i>Hydrochara dichromata</i>      | Coleoptera        | Hadera     | 938                                                | 47300                                            | 13 $\times$ 1                       |
| <i>Berosus dispar</i>             | Coleoptera        | Ga'ash     | 402                                                | 42000                                            | 10 $\times$ 3                       |
| <i>Haliptus lineatocollis</i>     | Coleoptera        | Avi'el     | 1007                                               | 41500                                            | 12 $\times$ 3                       |
| <i>Echinogammarus foxi</i>        | Amphipoda         | Avi'el     | 1007                                               | 41250                                            | 15 $\times$ 3                       |
| <i>Platycnemis sp.</i>            | Odonata           | Avi'el     | 1020                                               | 40800                                            | 12 $\times$ 3                       |
| <i>Pseudagrion sp.</i>            | Odonata           | Avi'el     | 1020                                               | 36600                                            | 15 $\times$ 3                       |
| Hydracarina -adult                | Acari             | Ga'ash     | 350                                                | 35700                                            | 12 $\times$ 2                       |
| <i>Gammarus syriacus</i>          | Amphipoda         | HaShofet   | 679                                                | 31800                                            | 20 $\times$ 3                       |
| <i>Lestes virens</i>              | Odonata           | Hadera     | 874                                                | 30400                                            | 16 $\times$ 1                       |
| <i>Lestes barbarus</i>            | Odonata           | Hadera     | 874                                                | 29500                                            | 12 $\times$ 1                       |
| <i>Culex pipiens</i>              | Diptera           | Hadera     | 938                                                | 28900                                            | 15 $\times$ 3                       |
| <i>Melanopsis buccinoidea</i>     | Archaeogastropoda | Zuqim      | 6500                                               | 28800                                            | 20 $\times$ 1                       |
| Hydracarina -young                | Acari             | Ga'ash     | 402                                                | 28000                                            | 13 $\times$ 2                       |
| <i>Melanopsis buccinoidea</i>     | Archaeogastropoda | Hermon     | 433                                                | 25100                                            | 26 $\times$ 1                       |
| <i>Culiseta longiareolata</i>     | Diptera           | Tel-Aviv   | 1005                                               | 25000                                            | 15 $\times$ 3                       |
| <i>Theodoxus michonii</i>         | Archaeogastropoda | Zuqim      | 6518                                               | 23000                                            | 20 $\times$ 1                       |
| <i>Notonecta maculata</i>         | Hemiptera         | HaShofet   | 671                                                | 22800                                            | 10 $\times$ 3                       |
| <i>Laccophilus minutus</i> -larva | Coleoptera        | Avi'el     | 1034                                               | 22200                                            | 7 $\times$ 3                        |
| <i>Chironomus sp.</i>             | Diptera           | Hadera     | 874                                                | 21100                                            | 8 $\times$ 3                        |
| <i>Cloeon dipterum</i>            | Ephemeroptera     | Dora       | 470                                                | 20000                                            | 14 $\times$ 2                       |
| <i>Theodoxus michonii</i>         | Archaeogastropoda | Hermon     | 334                                                | 19700                                            | 25 $\times$ 1                       |
| <i>Anisops sp.</i>                | Hemiptera         | Dora       | 470                                                | 18400                                            | 14 $\times$ 3                       |
| Ostracoda                         | Ostracoda         | Ga'ash     | 413                                                | 13300                                            | 10 $\times$ 3                       |
| <i>Caenis sp.</i>                 | Ephemeroptera     | Avi'el     | 1034                                               | 12900                                            | 16 $\times$ 3                       |
| <i>Hydropsyche sp.</i>            | Trichoptera       | Divsha     | 334                                                | 12800                                            | 10 $\times$ 2                       |
| <i>Hydroptila sp.</i>             | Trichoptera       | Avi'el     | 1034                                               | 12400                                            | 10 $\times$ 2                       |
| <i>Cyzicus sp.</i>                | Branchiopoda      | Hadera     | 938                                                | 12100                                            | 7 $\times$ 3                        |
| <i>Physella acuta</i>             | Archaeogastropoda | Ga'ash     | 413                                                | 12000                                            | 12 $\times$ 3                       |
| <i>Gyraulus ehrenbergi</i>        | Archaeogastropoda | Avi'el     | 1020                                               | 12000                                            | 7 $\times$ 3                        |
| <i>Hydropsyche sp.</i>            | Trichoptera       | Avi'el     | 1034                                               | 11800                                            | 7 $\times$ 3                        |
| <i>Baetis sp.</i>                 | Ephemeroptera     | Avi'el     | 1036                                               | 10300                                            | 13 $\times$ 2                       |
| <i>Chirocephalus neumanni</i>     | Branchiopoda      | Hadera     | 938                                                | 9500                                             | 20 $\times$ 1                       |
| Ostracoda                         | Ostracoda         | Ga'ash     | 350                                                | 8800                                             | 12 $\times$ 3                       |
| <i>Daphnia magna</i>              | Branchiopoda      | Ga'ash     | 350                                                | 8400                                             | 20 $\times$ 3                       |
| <i>Daphnia curvirostris</i>       | Branchiopoda      | Hadera     | 874                                                | 8250                                             | 25 $\times$ 3                       |
| <i>Simulium sp.</i>               | Diptera           | HaShofet   | 679                                                | 8000                                             | 10 $\times$ 1                       |
| <i>Daphnia magna</i>              | Branchiopoda      | Ga'ash     | 413                                                | 7000                                             | 20 $\times$ 3                       |
| <i>Baetis sp.</i>                 | Ephemeroptera     | Divsha     | 334                                                | 3800                                             | 10 $\times$ 2                       |
| <i>Berosus dispar</i> -larva      | Coleoptera        | Ga'ash     | 420                                                | 2200                                             | 10 $\times$ 1                       |
| <i>Berosus dispar</i> -eggs       | Coleoptera        | Ga'ash     | 420                                                | 1800                                             | 10 $\times$ 1                       |
