# Supplementary material for: Global Scale Variation in the Salinity Sensitivity of Riverine Macroinvertebrates: Eastern Australia, France, Israel and South Africa
Source: PubMed Central journal article supplement (PMC3342278; doi:10.1371/journal.pone.0035224), 2012-05-02
Supplement: pone.0035224.s002.pdf [file pone.0035224.s002.pdf]

**Table S2. Salinity sensitivity data (mS/cm @ 25°C) collected for common species from France.**

| Comon                                 |                      | Family                    | Genus                                                                                      | Species                  | n            | LC <sub>50</sub><br>(mS/cm) |
|---------------------------------------|----------------------|---------------------------|--------------------------------------------------------------------------------------------|--------------------------|--------------|-----------------------------|
| <b>Turbellaria</b>                    | <b>Tricladida</b>    | Dugesidae                 | <i>Dugesia</i>                                                                             | <i>D. polychroa</i>      | 180          | 11.6                        |
|                                       |                      |                           |                                                                                            | <i>D. tigrina</i>        | 144          | 12.2                        |
| <b>Gastropoda</b>                     | <b>Gastropod</b>     | Hydrobiidae               | <i>Potamopyrgus</i>                                                                        | <i>P. antipodarum</i>    | 225          | 37.9                        |
|                                       | <b>Prosobranchia</b> | Viviparidae               | <i>Viviparus</i>                                                                           | <i>V. contectus</i>      | 180          | 6.5                         |
|                                       |                      | Bithyniidae               | <i>Bithynia</i>                                                                            | <i>B. tentaculata</i>    | 168          | 11.8                        |
|                                       |                      | Neritidae                 | <i>Theodoxus</i>                                                                           | <i>T. fluviatilis</i>    | 225          | 20                          |
| <b>Pulmonate</b>                      | Ancylidae            | <i>Ancylus</i>            | <i>A. fluviatilis</i>                                                                      | 120                      | 4.6          |                             |
|                                       | Limnaeidae           | <i>Radix</i>              | <i>R. ovata</i>                                                                            | 210                      | 12           |                             |
| <b>Hydracarina</b>                    |                      |                           |                                                                                            | Hydracarina spp.         | 120          | 19.3                        |
| <b>Crustacea</b>                      | <b>Isopoda</b>       | Asellidae                 | <i>Asellus</i><br><i>Proasellus</i>                                                        | <i>A. aquaticus</i>      | 210          | 21.6                        |
|                                       |                      |                           |                                                                                            | <i>P. meridianus</i>     | 215          | 24.4                        |
|                                       | <b>Amphipoda</b>     | Corophiidae<br>Gammaridae | <i>Chelicorophium</i><br><i>Dikerogammarus</i><br><i>Echinogammarus</i><br><i>Gammarus</i> | <i>C. curvispinum</i>    | 195          | 14.8                        |
|                                       |                      |                           |                                                                                            | <i>D. villosus</i>       | 195          | 26.6                        |
| <i>E. berilloni</i>                   |                      |                           |                                                                                            | 139                      | 28.3         |                             |
| <i>G. roeseli</i>                     |                      |                           |                                                                                            | 210                      | 11           |                             |
| <i>G. pulex</i>                       |                      |                           |                                                                                            | 180                      | 17.5         |                             |
| <i>G. tigrinus</i>                    |                      |                           |                                                                                            | 165                      | 40.5         |                             |
| <i>G. pulex</i><br><i>G. fossarum</i> |                      |                           |                                                                                            | 160<br>120               | 16.9<br>13.5 |                             |
| <b>Decapoda</b>                       | Atyidae              | <i>Athyaephyra</i>        | <i>A. desmarestii</i>                                                                      | 180                      | 34.7         |                             |
| <b>Insecta</b>                        | <b>Coleoptera</b>    | Elmidae                   | <i>Esolus</i><br><i>Elmis sp.(A)</i><br><i>Elmis sp.(L)</i><br><i>Esolus</i>               | <i>E. parallelipedus</i> | 195          | 19.9                        |
|                                       |                      |                           |                                                                                            | <i>Elmis sp.(A)</i>      | 100          | 20.2                        |
|                                       |                      |                           |                                                                                            | <i>Elmis sp.(L)</i>      | 111          | 17.5                        |
|                                       |                      |                           |                                                                                            | <i>E. angustatus (A)</i> | 153          | 18.6                        |
|                                       | <b>Diptera</b>       | Chironomidae              | <i>Chironomus</i>                                                                          | <i>C. plumosus</i>       | 180          | 23.1                        |
|                                       |                      | Simuliidae                | <i>Simulini</i>                                                                            | <i>Simulini sp.</i>      | 180          | 7.8                         |
|                                       | <b>Ephemeroptera</b> | Baetidae                  | <i>Baetis</i>                                                                              | <i>B. rhodani</i>        | 180          | 7.3                         |
|                                       |                      | Ephemerellidae            | <i>Ephemerella</i>                                                                         | <i>E. ignita</i>         | 195          | 4.9                         |
|                                       |                      | Potamanthidae             | <i>Potamanthus</i>                                                                         | <i>P. luteus</i>         | 225          | 13.8                        |
|                                       | <b>Hemiptera</b>     | Aphelocheiridae           | <i>Aphelocheirus</i>                                                                       | <i>A. aestivalis</i>     | 140          | 26.8                        |
|                                       | <b>Odonata</b>       | Caenagrionidae            | <i>Caenagrion</i>                                                                          | <i>C. puella</i>         | 150          | 43                          |
|                                       |                      | Platicnemididae           | <i>Platycnemis</i>                                                                         | <i>P. pennipes</i>       | 168          | 50.4                        |
| <b>Trichoptera</b>                    | Hydropsychidae       | <i>Hydropsyche</i>        | <i>H. pellucidula</i>                                                                      | 195                      | 19.3         |                             |
|                                       |                      |                           | <i>H. contubernalis</i>                                                                    | 180                      | 14.5         |                             |
|                                       |                      |                           | <i>H. exocellata</i>                                                                       | 180                      | 18.9         |                             |
|                                       |                      |                           | <i>H. siltalai</i>                                                                         | 180                      | 15           |                             |
|                                       | Leptoceridae         | <i>Athripsodes</i>        | <i>A. cinereus</i>                                                                         | 150                      | 24.7         |                             |
