# Supplementary material for: Global Scale Variation in the Salinity Sensitivity of Riverine Macroinvertebrates: Eastern Australia, France, Israel and South Africa
Source: PubMed Central journal article supplement (PMC3342278; doi:10.1371/journal.pone.0035224), 2012-05-02
Supplement: pone.0035224.s003.pdf [file pone.0035224.s003.pdf]

**Table S3. Salinity sensitivity data (mS/cm @ 25°C) collected for rare species from France.**

| Rare               |                      | Family                  | Genus                  | Species                  | n           | LC <sub>50</sub> |
|--------------------|----------------------|-------------------------|------------------------|--------------------------|-------------|------------------|
| <b>Turbellaria</b> | <b>Tricladida</b>    | Dendrocoelidae          | <i>Dendrocoelum</i>    | <i>D. lacteum</i>        | 21          | 12.8 - 16.0      |
| <b>Annelida</b>    | <b>Leech</b>         | Erpobdellidae           | <i>Erpobdella</i>      | <i>E. testacea</i>       | 40          | 11.3 - 12.8      |
|                    |                      | Erpobdellidae           | <i>Erpobdella</i>      | <i>E. octoculata</i>     | 30          | 12.9 - 15.1      |
|                    |                      | Glossiphonidae          | <i>Glossiphonia</i>    | <i>G. complanata</i>     | 13          | 10.3 - 12.5      |
|                    |                      | Piscicolidae            | <i>Piscicola</i>       | <i>P. geometra</i>       | 25          | 15.8 - 19.0      |
| <b>Crustacea</b>   | <b>Decapoda</b>      | Cambaridae              | <i>Orconectes</i>      | <i>O. limosus</i>        | 18          | 44.0 - 49.8      |
|                    |                      | Astacidae               | <i>Astacus</i>         | <i>A. astacus</i>        | 45          | 44.0 - 48.0      |
| <b>Gastropoda</b>  | <b>Pulmonate</b>     | Lymnaeidae              | <i>Lymnaea</i>         | <i>L. stagnalis</i>      | 50          | 10.3 - 11.3      |
|                    |                      | Physidae                | <i>Physa</i>           | <i>P. acuta</i>          | 5           | 8.0 - 14.6       |
| <b>Insecta</b>     | <b>Coleoptera</b>    | Gyrinidae               | <i>Orectochilus</i>    | <i>O. villosus</i> (L)   | 10          | 27.4 - 33.3      |
|                    |                      | Elmidae                 | <i>Esolus</i>          | <i>E. angustatus</i> (L) | 14          | 18.6             |
|                    |                      | Elmidae                 | <i>Stenelmis</i>       | <i>S. canaliculata</i>   | 3           | 14.8 - 20.4      |
|                    |                      | Dysticidae              | <i>Platambus</i>       | <i>P. maculatus</i> (L)  | 2           | 20.6 - 29.8      |
|                    |                      | Dysticidae              | <i>Dysticus</i>        | <i>D. marginalis</i> (A) | 2           | >51.0            |
|                    |                      | Scirtidae               | <i>Elodes</i>          | <i>Elodes</i> sp. (L)    | 14          | 19.2             |
|                    | <b>Diptera</b>       | Athericidae             | <i>Atheryx</i>         | <i>Atheryx</i> sp.       | 6           | 35.1 - 45.1      |
|                    |                      |                         | <i>Athricops</i>       | <i>A. crassipes</i>      | 10          | 35.1 - 45.1      |
|                    |                      | Empididae               |                        | Empididae spp.           | 12          | 39.2             |
|                    |                      | Limoniidae              | <i>Pediciini</i>       | <i>P. dicranota</i>      | 45          | 10.8 - 14.3      |
|                    |                      |                         | <i>Hexatomi</i>        | <i>Hexatoma</i> sp.      | 3           | 19.2 - 23.0      |
|                    |                      | Tabanidae               |                        | Tabanidae spp.           | 10          | 54.7 - 59.8      |
|                    | Tipulidae            |                         | Tipulidae spp.         | 13                       | 15.1 - 20.0 |                  |
|                    | <b>Ephemeroptera</b> | Baetidae                | <i>Baetis</i>          | <i>B. niger</i>          | 12          | 12.0 - 14.5      |
|                    |                      | Ephemeridae             | <i>Ephemer</i>         | <i>E. danica</i>         | 4           | 2.5 - 4.1        |
|                    |                      |                         |                        | <i>E. vulgata</i>        | 5           | 6.8              |
|                    |                      | Heptageneidae           | <i>Rhithrogena</i>     | <i>R. semicolorata</i>   | 3           | 2.8 - 6.8        |
|                    | Oligoneuriellidae    | <i>Oligoneuriella</i>   | <i>O. rhenana</i>      | 21                       | 1.8 - 2.9   |                  |
|                    | <b>Hemiptera</b>     | Corixidae               | <i>Micronecta</i>      | <i>M. poweri</i>         | 5           | 25.0 - 29.0      |
|                    |                      |                         | <i>Sigara</i>          | <i>Sigara</i> sp.        | 2           | 20.6 - 30.0      |
|                    |                      | Heptageneidae           | <i>Naucoris</i>        | <i>N. maculatus</i>      | 1           | >32.6            |
|                    |                      | Nepidae                 | <i>Nepa</i>            | <i>N. cinerea</i>        | 2           | 8.0 - 16.9       |
|                    |                      |                         | <i>Ranatra</i>         | <i>R. linearis</i>       | 6           | >51.0            |
|                    | Notonectidae         | <i>Notonecta</i>        | <i>N. glauca</i>       | 6                        | 29.7 - 34.5 |                  |
|                    | <b>Lepidoptera</b>   | Crambidae               | <i>Acentria</i>        | <i>A. ephemerella</i>    | 4           | 18.0 - 24.3      |
|                    | <b>Megaloptera</b>   | Sialidae                | <i>Sialis</i>          | <i>S. lutaria</i>        | 21          | 39.2 - 44.0      |
|                    | <b>Odonata</b>       | Aeshnidae               | <i>Boyera</i>          | <i>B. irene</i>          | 2           | 29.7 - 34.5      |
| Caenagrionidae     |                      | <i>Ischnura</i>         | <i>I. elegans</i>      | 9                        | 47.8 - 49.9 |                  |
| Calopterygidae     |                      | <i>Calopteryx</i>       | <i>C. splendens</i>    | 55                       | 27.5 - 32.7 |                  |
|                    |                      |                         | <i>C. virgo</i>        | 24                       | 29.7 - 33.3 |                  |
| Corduliidae        |                      | <i>Somatochlora</i>     | <i>S. metallica</i>    | 8                        | 32.6        |                  |
| Gomphidae          |                      | <i>Onychogomphus</i>    | <i>O. forcipatus</i>   | 5                        | 32.8 - 35.8 |                  |
|                    |                      | <i>Gomphus</i>          | <i>G. pulchellus</i>   | 4                        | 24.8 - 29.9 |                  |
|                    |                      | <i>G. vulgatissimus</i> | 3                      | 27.5 - 32.9              |             |                  |
| <b>Plecoptera</b>  | Leuctridae           | <i>Euleuctra</i>        | <i>E. geniculata</i>   | 6                        | 16.6 - 23.4 |                  |
|                    |                      | <i>Leuctra</i>          | <i>L. fusca</i>        | 27                       | 7.3 - 10.8  |                  |
| <b>Trichoptera</b> | Brachycentridae      | <i>Brachycentrus</i>    | <i>B. subnubilus</i>   | 3                        | 26.6 - 32.8 |                  |
|                    | Lepidostomatidae     | <i>Lepidostoma</i>      | <i>L. hirtum</i>       | 8                        | 14.8        |                  |
|                    | Leptoceridae         | <i>Oecetis</i>          | <i>O. ochracea</i>     | 6                        | 10.4 - 18.7 |                  |
|                    | Limnephilidae        | <i>Halesus</i>          | <i>H. tessellatus</i>  | 16                       | 12.9 - 19.0 |                  |
|                    |                      | <i>Micropterna</i>      | <i>M. lateralis</i>    | 10                       | 7.5 - 9.3   |                  |
|                    |                      | <i>Potamophylax</i>     | <i>P. luctuosa</i>     | 3                        | 12.9 - 19.0 |                  |
|                    | Polycentropodidae    | <i>Neureclipsis</i>     | <i>N. bimaculata</i>   | 21                       | 16.9 - 20.0 |                  |
|                    |                      | <i>Cyrnus</i>           | <i>C. trimaculatus</i> | 8                        | 25.0        |                  |
|                    | Rhyacophilidae       | <i>Rhyacophila</i>      | <i>R. dorsalis</i>     | 6                        | 1.8 - 2.5   |                  |
|                    | Sericostomatidae     | <i>Sericostoma</i>      | <i>S. personatum</i>   | 14                       | 16.0        |                  |
